# Supplementary material for: Unveiling the anti-inflammatory potential of 11β,13-dihydrolactucin for application in inflammatory bowel disease management
Source: Royal Society of Chemistry journal article supplement (doi:10.1039/d4fo01446d), 2024-01-01
Supplement: d4fo01446d1.pdf [file d4fo01446d1.pdf]

## Supplementary material

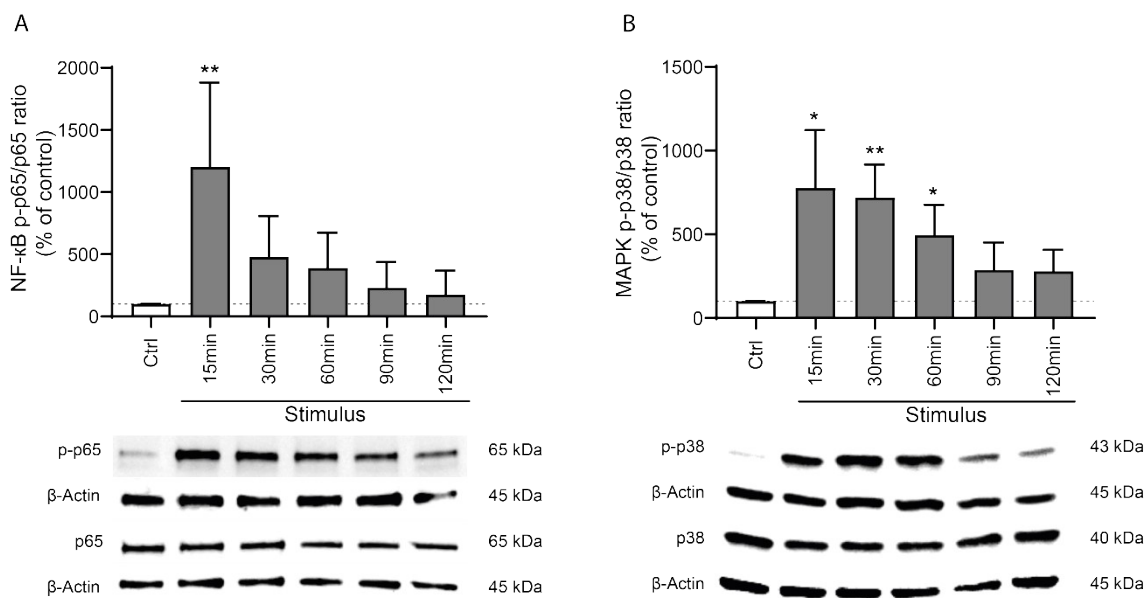

**Figure S1. Determination of the incubation period with the pro-inflammatory cocktail to evaluate the NF-κB and MAPK signaling pathways in the triple co-culture.** A) NF-κB p65 subunit and B) MAPK p38 phosphorylation ratios assessed by Western blot after treatment of cells with the pro-inflammatory cocktail (10 μg/mL LPS in the apical compartment; 25 ng/mL IL-1β and 50 ng/mL TNF-α in the basolateral compartment) for incubation periods ranging from 15 to 120min. All results are presented as a percentage of the unstimulated control and were obtained from at least three independent biological replicates. \*p<0.05, \*\*p<0.01 relative to the unstimulated control.

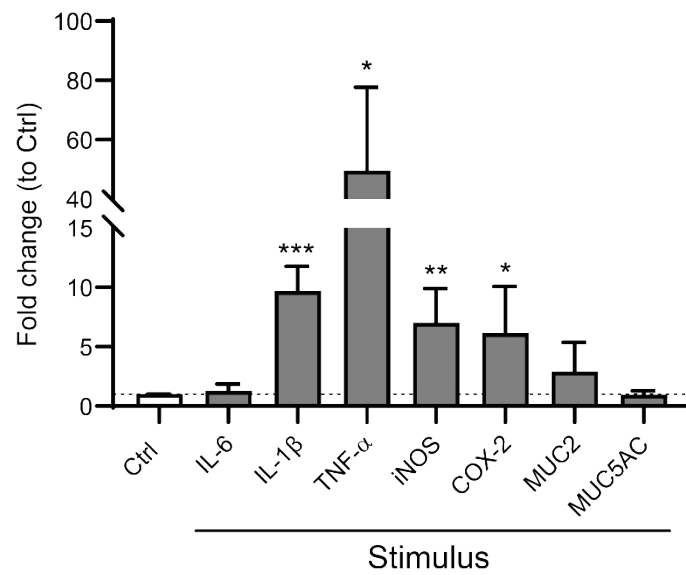

**Figure S2.** Expression levels of genes related to inflammation, including pro-inflammatory cytokines, inducible enzymes, and mucins following the incubation of the triple co-culture with the pro-inflammatory cocktail (10  $\mu\text{g}/\text{mL}$  LPS in the apical compartment; 25  $\text{ng}/\text{mL}$  IL-1 $\beta$  and 50  $\text{ng}/\text{mL}$  TNF- $\alpha$  in the basolateral compartment) for 3h, assessed by RT-PCR. All results are presented as a percentage of the unstimulated control and were obtained from at least three independent biological replicates. \* $p < 0.05$ , \*\* $p < 0.01$ , \*\*\* $p < 0.001$  relative to the unstimulated control.

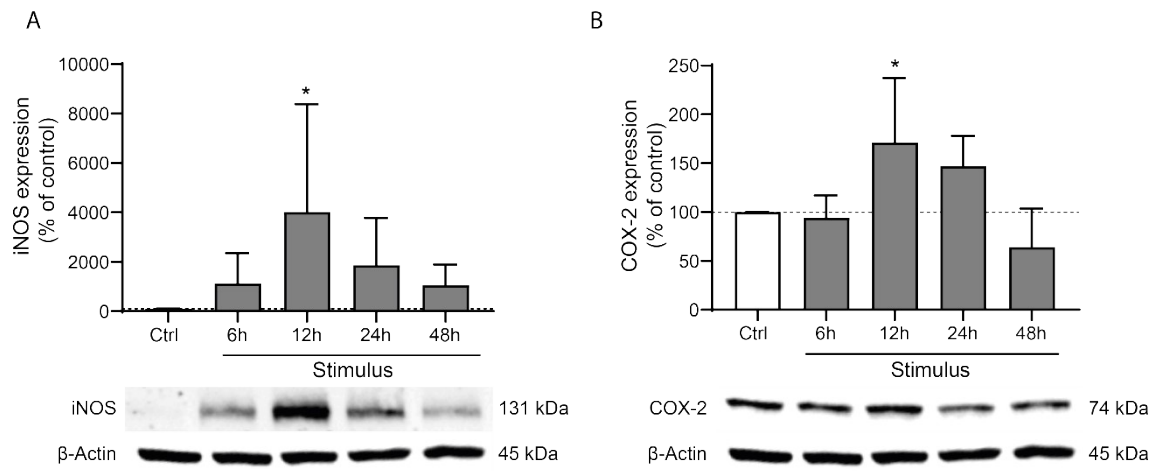

**Figure S3. Determination of the incubation period with the pro-inflammatory cocktail to evaluate the protein expression levels of inducible enzymes in the triple co-culture.** A) iNOS and B) COX-2 protein expressions assessed by Western blot after treatment of cells with the pro-inflammatory cocktail stimulus (10  $\mu\text{g}/\text{mL}$  LPS in the apical compartment; 25 ng/mL IL-1 $\beta$  and 50 ng/mL TNF- $\alpha$  in the basolateral compartment) for incubation periods ranging from 6 to 48h. All results are presented as a percentage of the unstimulated control and were obtained from at least three independent biological replicates. \* $p < 0.05$  relative to the unstimulated control.

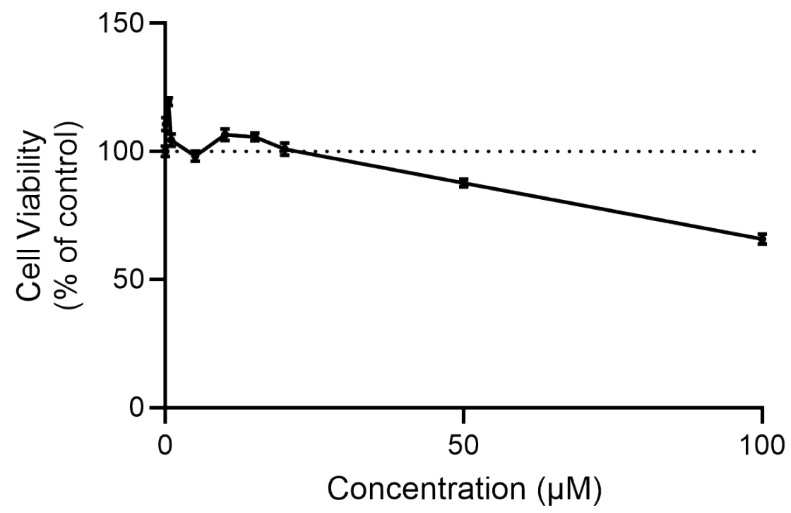

Figure S4. Cytotoxic assessment of 11β,13-dihydrolactucin (0.1–100 µM) in human colon-derived CCD18-Co myofibroblasts by metabolic reduction of MTT after 24-hours of incubation.
